# Supplementary material
Source: PubMed Central journal article supplement (PMC6441696)
Supplement: AnnalsATS.201806-375OC_gandotra_data_supplement.pdf [file AnnalsATS.201806-375OC_gandotra_data_supplement.pdf]

**Online Data Supplement**

**Physical Function Trajectories in Survivors of Acute Respiratory Failure**

Sheetal Gandotra, MD; James Lovato, MS; Douglas Case, PhD; Rita N. Bakhru MD, MS; Kevin Gibbs, MD; Michael Berry PhD, D. Clark Files, MD; and Peter E. Morris, MD

**Supplemental Table E1: Statistical parameters for the selected trajectory model**

| SPPB vs Time                                                   |           |                       |                |                          |             |
|----------------------------------------------------------------|-----------|-----------------------|----------------|--------------------------|-------------|
| Maximum Likelihood Estimates<br>Model: Censored Normal (CNORM) |           |                       |                |                          |             |
| Group                                                          | Parameter | Estimate              | Standard Error | T for H0:<br>Parameter=0 | Prob >  T   |
| 1                                                              | Intercept | -0.34556              | 0.69731        | -0.496                   | 0.6203      |
|                                                                | Linear    | 23.46244              | 3.60296        | 6.512                    | 0.0000      |
|                                                                | Quadratic | -13.14795             | 1.97082        | -6.671                   | 0.0000      |
| 2                                                              | Intercept | -2.31744              | 0.92089        | -2.517                   | 0.0120      |
|                                                                | Linear    | 3.25175               | 0.66365        | 4.900                    | 0.0000      |
|                                                                | Quadratic | -0.39134              | 0.10278        | -3.808                   | 0.0002      |
| 3                                                              | Intercept | 4.72019               | 0.44459        | 10.617                   | 0.0000      |
|                                                                | Linear    | 2.62523               | 0.33939        | 7.735                    | 0.0000      |
|                                                                | Quadratic | -0.31241              | 0.05354        | -5.835                   | 0.0000      |
| 4                                                              | Intercept | 7.67694               | 0.73206        | 10.487                   | 0.0000      |
|                                                                | Linear    | 5.82864               | 1.03719        | 5.620                    | 0.0000      |
|                                                                | Quadratic | -0.72249              | 0.17251        | -4.188                   | 0.0000      |
|                                                                | Sigma     | 3.59998               | 0.13718        | 26.242                   | 0.0000      |
| Group membership                                               |           |                       |                |                          |             |
| 1                                                              | (%)       | 17.53949              | 2.63235        | 6.663                    | 0.0000      |
| 2                                                              | (%)       | 15.33998              | 3.10795        | 4.936                    | 0.0000      |
| 3                                                              | (%)       | 47.72897              | 4.43463        | 10.763                   | 0.0000      |
| 4                                                              | (%)       | 19.39155              | 3.68855        | 5.257                    | 0.0000      |
| BIC= -1767.70 (N=840)                                          |           | BIC= -1758.31 (N=260) |                | AIC= -1729.83            | L= -1713.83 |
